# Supplementary material for: Translational Read-Through Drugs (TRIDs) Are Able to Restore Protein Expression and Ciliogenesis in Fibroblasts of Patients with Retinitis Pigmentosa Caused by a Premature Termination Codon in FAM161A
Source: MDPI journal article supplement (doi:10.3390/ijms23073541), 2022-03-24
Supplement: s1 [file s1]

## Supplementary Materials:

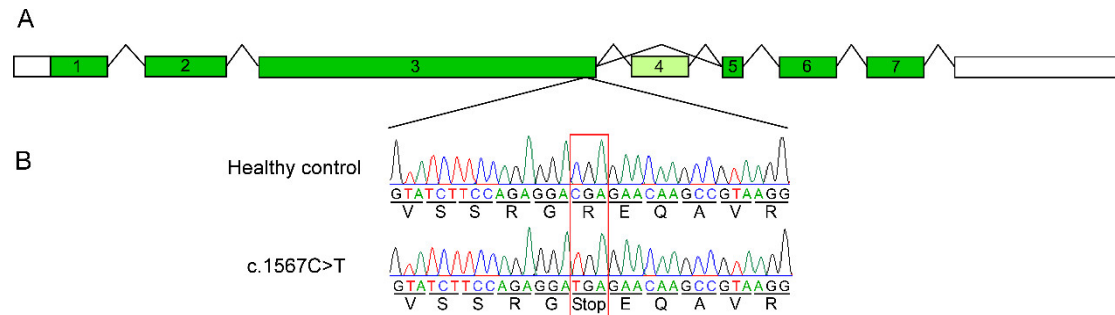

**Figure S1. *FAM161A* gene structure and c.1567C>T mutation location.** (A) A schematic representation of the human *FAM161A* gene. Green boxes represent exons 1-7, light green is the alternative exon 4 that can be spliced out, creating a short isoform. White boxes represent untranslated regions (UTRs). (B) The pathogenic nonsense mutation in *FAM161A* gene. Towards the end of exon 3, a point mutation causes a premature termination codon c.1567C>T (p.R523\*). Representative chromatograms of a healthy control and a homozygous patient (MOL1300-1) are presented.

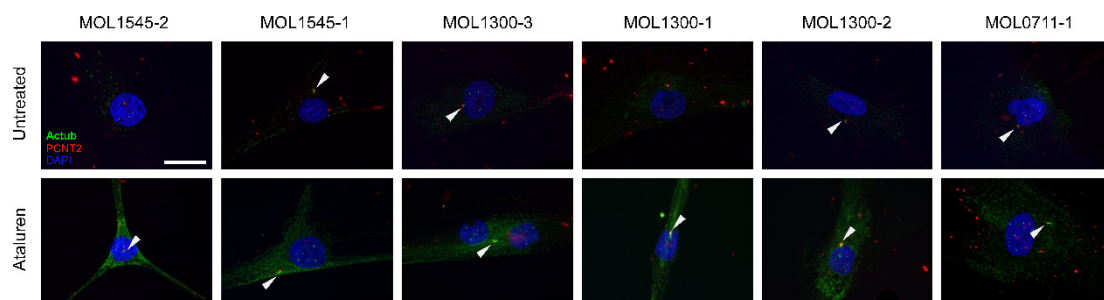

**Figure S2. Representative images of fibroblasts of all *FAM161A* patients participated in this study. Scale bar 25  $\mu$ m.**

**Table S1.** *In-silico* analysis of predicted amino acid exchanges resulting from translational read-through of p.Arg523\*. The following tools were used: SIFT (<http://sift.jvics.org>), PolyPhen-2 (<http://genetics.bwh.harvard.edu/pph2/>), and MutationTaster (<http://www.mutationtaster.org>).

| <i>Outcome</i>  | <i>Possible mispairing</i> | <i>Amino acid substitution</i> | <i>Physical properties</i>                  | <i>SIFT</i>  | <i>Polyphen-2</i>        | <i>MutationTaster</i>  |
|-----------------|----------------------------|--------------------------------|---------------------------------------------|--------------|--------------------------|------------------------|
| <i>Original</i> | CGA                        | Arg (R)                        | Basic<br>Highly polar<br>Positively charged | Healthy      | Healthy                  | Healthy                |
| <i>Nonsense</i> | TGA                        | Termination codon              |                                             | Damaging [0] | Damaging [1.00]          | Disease causing [0.99] |
| <i>Rescue</i>   | AGA                        | Arg (R)                        | Basic                                       | Healthy      | Healthy                  | Healthy                |
| <i>Missense</i> | GGA                        | Gly (G)                        | Non-polar                                   | Damaging [0] | Probably damaging [1.00] | Disease causing [0.99] |
| <i>Nonsense</i> | TAA                        | Termination codon              |                                             | Damaging [0] | Damaging [1.00]          | Disease causing [0.99] |
| <i>Missense</i> | TTA                        | Leu (L)                        | Non-polar                                   | Damaging [0] | Probably damaging [1.00] | Disease causing [0.99] |
| <i>Missense</i> | TCA                        | Ser (S)                        | Uncharged Polar                             | Damaging [0] | Probably damaging [1.00] | Disease causing [0.99] |
| <i>Missense</i> | TGG                        | Trp (W)                        | Non-polar                                   | Damaging [0] | Probably damaging [1.00] | Disease causing [0.99] |
| <i>Missense</i> | TGC                        | Cys (C)                        | Uncharged Polar                             | Damaging [0] | Probably damaging [1.00] | Disease causing [0.99] |
| <i>Missense</i> | TGT                        | Cys (C)                        | Uncharged Polar                             | Damaging [0] | Probably damaging [1.00] | Disease causing [0.99] |

**Table S2. Expression of  $\alpha$ -tubulin—detailed data for each patient.** The number of cells with  $\alpha$ -tubulin labelling counted for each cell line are indicated.

|                                                     |     | Untr | DMSO | Gent | Ata |           | Untr | DMSO | Gent | Ata |
|-----------------------------------------------------|-----|------|------|------|-----|-----------|------|------|------|-----|
| # of cells counted in total                         | WT1 | 300  |      |      |     | MOL1545-2 | 300  | 300  | 300  | 300 |
| # of cells with positive $\alpha$ -tubulin staining |     | 284  |      |      |     |           | 253  | 241  | 277  | 284 |
| # of cells counted in total                         | WT2 | 300  | 300  | 300  | 300 | MOL1545-1 | 300  | 300  | 300  | 300 |
| # of cells with positive $\alpha$ -tubulin staining |     | 290  | 283  | 267  | 275 |           | 254  | 258  | 272  | 282 |
| # of cells counted in total                         | WT3 | 300  | 300  | 300  | 300 | MOL1300-3 | 300  | 300  | 300  | 300 |
| # of cells with positive $\alpha$ -tubulin staining |     | 286  | 285  | 287  | 289 |           | 262  | 267  | 280  | 288 |
| # of cells counted in total                         | WT4 | 300  | 300  | 300  | 300 | MOL1300-1 | 300  | 300  | 300  | 300 |
| # of cells with positive $\alpha$ -tubulin staining |     | 269  | 272  | 261  | 274 |           | 245  | 253  | 275  | 279 |
| # of cells counted in total                         | WT5 | 300  | 300  | 300  | 300 | MOL1300-2 | 300  | 300  | 300  | 300 |
| # of cells with positive $\alpha$ -tubulin staining |     | 277  | 269  | 258  | 262 |           | 269  | 271  | 278  | 281 |
| # of cells counted in total                         |     |      |      |      |     | MOL0711-1 | 300  | 300  | 300  | 300 |
| # of cells with positive $\alpha$ -tubulin staining |     |      |      |      |     |           | 244  | 227  | 266  | 272 |

**Table S3. Summary of ciliogenesis and cilia length analyses—detailed data for each patient.** The number of the cells that were counted per each cell line and the number of the ciliated cells that were counted in each experiment.

Ata: Ataluren; Gent: Gentamicin; Untr: untreated.

|                             |     | Untr | DMSO | Gent | Ata |           | Untr | DMSO | Gent | Ata |
|-----------------------------|-----|------|------|------|-----|-----------|------|------|------|-----|
| # of cells counted in total | WT1 | 300  |      |      |     | MOL1545-2 | 300  | 300  | 300  | 300 |
| # of ciliated cells         |     | 225  |      |      |     |           | 121  | 116  | 136  | 231 |
| # of cells counted in total | WT2 | 300  | 300  | 300  | 300 | MOL1545-1 | 300  | 300  | 300  | 300 |
| # of ciliated cells         |     | 244  | 247  | 233  | 242 |           | 107  | 111  | 115  | 256 |
| # of cells counted in total | WT3 | 300  | 300  | 300  | 300 | MOL1300-3 | 300  | 300  | 300  | 300 |
| # of ciliated cells         |     | 227  | 225  | 237  | 238 |           | 81   | 92   | 91   | 162 |
| # of cells counted in total | WT4 | 300  | 300  | 300  | 300 | MOL1300-1 | 300  | 300  | 300  | 300 |
| # of ciliated cells         |     | 209  | 247  | 232  | 244 |           | 121  | 126  | 125  | 188 |
| # of cells counted in total | WT5 | 300  | 300  | 300  | 300 | MOL1300-2 | 300  | 300  | 300  | 300 |
| # of ciliated cells         |     | 202  | 204  | 188  | 204 |           | 108  | 93   | 101  | 191 |
| # of cells counted in total |     |      |      |      |     | MOL0711-1 | 300  | 300  | 300  | 300 |
| # of ciliated cells         |     |      |      |      |     |           | 79   | 71   | 82   | 171 |
